# Supplementary material for: Mindfulness Training for Improving Attention Regulation in University Students: Is It Effective? and Do Yoga and Homework Matter?
Source: Front Psychol. 2020 Apr 29;11:719. doi: 10.3389/fpsyg.2020.00719 (PMC7202325; doi:10.3389/fpsyg.2020.00719)
Supplement: DATA SHEET S1 — Data set of the present study. [file Data_Sheet_1.CSV]

PbnCode	seminar	group_rough	teacher	age.1	group_med	priorExperience	gender	tms_meana	totalDuration	d2_FPrChange	d2_BZOChange	d2_KLChange	numberLetterRTChange	numberLetterRAChange	flankerRAChange	flankerRTChange	visualSearchCRChange	visualSearchFAChange	visualSearchHitChange	visualSearchMisChange	visualSearchRTblChange	visualSearchRToffChange	filter_$	d2R_FRohZRE_1	d2R_BZORohZRE_1	d2R_KLRohZRE_1	numberLetterRTZRE_1	numberLetterRAZRE_1	flankerRAZRE_1	flankerRTZRE_1	visualSearchCRZRE_1	visualSearchFAZRE_1	visualSearchHitZRE_1	visualSearchMisZRE_1	visualSearchRTBlanksZRE_1	visualSearchRTOffsZRE_1
A1MA07E	6	5	2	24	4	0	1	38.2	1310	-2.8	55	50	-41.1675708424181	8.02464228934817	4	-33.7921165298293	2	-2	-1	1	-1296.99107142857	-433.547632287349	1	.350959934528325	1.69459353363093	1.50052660103766	-.361727283370048	2.07080135476959	.884051608199459	-.10388880526396	.656051115682814	-.689961910631097	-.965412253638916	.964986632902838	-1.04977920908637	-.745467060400629
A1ME05L	6	5	2	24	4	0	1	31.75	1230	.799999999999999	43	38	-28.5433262665799	.725850771507069	-63	-56.2323236889691	-2	2	1	-1	-716.107142857143	-670.765729597593	1	.28008333600466	1.07489816533736	.962218857003955	.249814292077547	.480601042325908	-2.34931367477269	-2.01512704990242	-2.10202647471818	2.22603500640454	.450212328988535	-.461228413446721	-.612288696486571	-1.22255498791684
A1ME20E	6	5	2	25	4	0	1	32	654	-2.6	9	12	-54.1037435709761	.0880600655452071	1	-20.8518943524831	0	0	1	-1	250.875	-132.661525800893	1	.0414852721161419	-.715406790512113	-.629445803063404	.179399686221483	.371314585887905	-.332035701315299	.0989638501625389	.691475631568233	-.631859854999005	1.28641251478499	-1.29184285753539	.525090865291555	-.286969579798497
A1MO12I	6	5	2	24	4	0	1	33.5	413	1.4	15	12	-119.506126240801	-4.05405405405405	1	-5.05932489451482	1	-1	-3	3	-2812.90178571429	-818.443107249133	1	.158205048974261	-.39205855370623	-.498268886392252	-.151102320899385	-.734114863843646	-.332035701315299	-.637126003741365	.673763373625523	-.660910882815051	-2.38103683626637	2.3912016792524	-2.37682306348806	-1.24573103763295
A1MO30T	6	5	2	23	4	0	1	30.75	1859	.2	14	13	-109.478945571081	-.153729185987245	0	-28.2982	0	0	-1	1	-95.0666666666666	-512.431775475445	1	-.0256699898259209	.235077952073981	-.0201285768998824	-1.59741757283026	-.112321881623906	.757971734858372	-.203038835076284	-.722987679517682	.768036547886722	-1.80161243943537	1.79560107699151	.0284919331698025	-1.46557001433145
A1MT21S	6	5	2	22	4	0	1	32	1793	1.9	38	27	-18.0745546690752	-2.07517457889759	-1	5.88718618059551	0	0	2	-2	-400.375	88.4779488515524	1	.883935567152555	1.44746758334292	.627772414877489	-.684980099316144	.120392104368122	-.675457489113079	1.01013019192084	.691475631568233	-.631859854999005	-.0962756583924229	.0715857295115045	-.66155962741868	-.00645023666866318
A1MU25I	6	5	2	23	4	0	1	27.6666666666667	934	-1.4	2	4	109.427028086909	2.76190476190476	1	14.7716139240509	0	0	1	-1	-183.0625	72.8023017712671	1	.371512887463748	-1.00564283853812	-1.06185620691667	.00722415596334872	.157083360416777	-.332035701315299	.387126015648713	.691475631568233	-.631859854999005	1.28641251478499	-1.29184285753539	.0634652960117516	.525028551558783
A1WA12L	6	5	2	23	4	0	2	33	2081	-1.8	20	22	-242.907721998353	-.427403328327188	5	-8.75838436258584	-1	1	0	0	440.683333333333	-147.652686606598	1	-.124627816184821	.0184040825159239	.0973980492974263	-1.53076565425856	-.635376911468311	2.03709898104367	.10038533490966	-.705275421574972	.797087575702768	.160500130573037	-.163428112316277	.427367073870666	-.698023580583384
A1WA13N	6	5	2	28	4	0	2	30.6666666666667	913	1.2	7	4	-111.162217497441	-2.92993979200875	-1	-31.3759368657192	1	0	-2	2	-1253.01666666667	27.2415135561551	1	.153722324729017	-.289167675376399	-.632549934174718	-.604368309334883	-.281107223596548	-.395075637985843	.25144326695193	.673763373625523	-.631859854999005	-1.25512445205441	1.26278693403328	-.388401694947448	.980382353398628
A1WA14L	6	5	2	23	4	0	2	23	2009	-1	25	27	-12.0245432079337	2.5	-1	-20.4996826923078	0	0	-1	1	503.2	-232.665753550946	1	-.339458430001591	.806882193192835	.800687441398552	-.939983119081578	-.216020403147271	-.675457489113079	-.469872570541278	.691475631568233	-.631859854999005	-.12921206784246	.134372188814168	1.46273044406957	-.360705076659516
A1WA22A	6	5	2	23	4	0	2	35.3333333333333	1488	.399999999999999	3	2	141.32814325658	1.72855313700384	1	-30.4576168101409	1	-1	1	-1	33.6160714285716	404.713689273925	1	.179095894873201	-.849747290090616	-1.01045960238211	2.73575693060709	.149397025889493	-.612417552442535	-.159249232992869	.673763373625523	-.660910882815051	1.28641251478499	-1.29184285753539	1.13556873372106	2.51989497695124
A1WA26S	6	5	2	24	4	0	2	19	370	3.4	48	38	-11.7668403115872	-4.95370370370371	-2	-17.3261293816943	-1	1	1	-1	-8.24166666666656	424.551412033127	1	.630663904287688	1.34135490652913	1.00395696685387	-.381373859460488	-1.71886217816895	-.70697745744835	-.267837083738059	-.705275421574972	.797087575702768	.450212328988535	-.461228413446721	-.0343324061462208	1.38470076429071
A1WE22E	6	5	2	26	4	0	2	27.3333333333333	625	.0999999999999996	49	41	-56.9112944788641	4.6385113498897	1	-91.9445886075951	0	0	1	-1	-1285.0625	-41.5545204906616	1	.605416479756959	1.14623608584007	.917918179369901	.580454827479064	.829126144650877	-.612417552442535	-.619956218881357	.691475631568233	-.631859854999005	.450212328988535	-.461228413446721	-.774345847350455	.307602912056452
A1WE27R	6	5	2	24	4	1	2	34.25	1832	-2.6	16	19	-118.392917195187	2.72955100275021	18	73.9289424991788	1	0	-1	1	-196.553571428572	-537.188174544868	0	-.0342975453528928	-.164160057743535	-.108729932167991	-.242582718479409	1.75207398704211	3.56838597391115	1.502643697005	.673763373625523	-.631859854999005	-.12921206784246	.134372188814168	2.01426807610228	.265459516104463
A1WI03L	6	5	2	24	4	0	2	35.5	1167	9	18	-1	-44.1817633614635	5.25853584677114	0	27.2834299561969	0	0	0	0	91.6625000000004	232.358070892318	1	2.88351213067815	-.464394014727662	-1.55049246264682	-.245673015303703	.711883336340634	-.363555669650571	.825735675860013	.691475631568233	-.631859854999005	.160500130573037	-.163428112316277	2.02996311670666	2.93768754112308
A1WI13K	6	5	2	24	4	0	2	34.25	1175	-2.9	23	26	-110.534219793245	-1.00656814449918	-1	.186898878021225	0	0	3	-3	351.866666666666	59.195910325755	1	-.333326784815607	-.116933957581302	.149632105385118	-.0842117867953652	-.457972702573124	-.955839340240314	-.198330438186216	-.722987679517682	.768036547886722	1.86583691161599	-1.88744345979628	.767031493609885	.829923515351452
A1WI17I	6	5	2	28	4	0	2	29.8	2032	-1.3	61	62	8.69972347913506	3.08465578184297	-1	-60.6963607594938	-1	1	0	0	-516.383333333333	184.251196074741	1	-.346182516369458	1.87393587540643	2.28330041704941	.834955382601896	-.118723029794682	-.395075637985843	-1.40298146651569	-.705275421574972	.797087575702768	.160500130573037	-.163428112316277	.234689182679578	1.83709846138955
A1WI21S	6	5	2	22	4	0	2	35.4	1991	-3.1	56	60	143.902060017116	-3.24522894945429	0	-47.9177653586009	0	0	2	-2	-1094.59134615385	-578.817156397663	1	-.597636311811827	1.52647581826007	2.09023094960592	1.21372372380135	-.883377617840878	-.643937520777807	.33046693901074	.691475631568233	-.631859854999005	1.57612471320049	-1.58964315866584	-.00210425667799177	-.967652983788591
A1WL25I	6	5	2	25	4	0	2	32	851	-1.8	38	42	-1.48821265492484	.552333199392024	0	-34.6680298604348	0	0	-1	1	646.6875	-269.395381622294	1	-.427759086060959	1.50146979397932	1.65244973508316	.226505603984974	-.190593110468126	-.363555669650571	-1.27202518995793	.691475631568233	-.631859854999005	-.965412253638916	.964986632902838	.806294961586279	-.682533474095769
A1WL27S	6	5	2	31	4	0	2	26.25	865	-3.1	32	34	-192.182572120487	3.44997562043328	1	-38.5270320929069	-1	1	-1	1	-1300.07916666667	-428.731071942555	1	-.0563304727472951	.575096871733698	.683406490302455	-.960963328091899	-.121390952936431	-.332035701315299	-.532948052694111	-.705275421574972	.797087575702768	-.965412253638916	.964986632902838	-1.20538736921547	-.0856950428870817
A1WM18N	6	5	2	24	4	0	2	29	1034	-2.7	30	31	15.7989709603579	-2.56318287164773	-6	-34.6720574464348	-1	1	0	0	705.866666666667	-329.819105104744	1	.125852844243845	.56031793333886	.542866967172614	.0508495794550264	.286226360550275	-1.39382103304391	-1.08773499341713	-.705275421574972	.797087575702768	.996700316369493	-.994042556404947	2.05405062830753	-.366011955699831
A1WN04I	6	5	2	35	4	1	2	35.2	4353	2.3	15	8	-118.610162342158	-1.49253731343283	0	7.39984651898754	0	0	0	0	26.125	459.669040447521	0	.362421293359803	.516978658673068	-.145047018223657	-1.27145225732834	-.531628338198348	-.643937520777807	.378518991329118	.691475631568233	-.631859854999005	.160500130573037	-.163428112316277	.0792540524673287	1.27050344229927
A1WN11E	6	5	2	24	4	0	2	33	794	-.5	31	31	22.062392632732	4.97489317063388	-3	15.1150991885751	6	-2	-1	1	-3061.1875	-369.311451939494	1	-.16585986766912	.66221127114997	.721744580815094	-.354220388977962	.871233874779103	-.458115574656386	.632861422260989	.585202083911973	-.689961910631097	-.965412253638916	.964986632902838	-2.41133443385347	-.917513602581149
A1WN12R	6	5	2	26	4	1	2	29	685	1	12	10	51.9877743506495	7.84401975718968	-1	.378688737423033	0	0	0	0	-625.875	-138.366972320883	0	.0626306662334469	-.64373635650316	-.673450592471499	.726803364825584	1.6924469932777	-.955839340240314	-.458951375939311	.691475631568233	-.631859854999005	.160500130573037	-.163428112316277	-.714864272785266	-.772752874842842
A1WN31L	6	5	2	23	4	0	2	36	1996	18.3	18	15	-126.443140456275	5.47893481717011	1	-11.581712277285	0	0	0	0	-493	-68.0372407398231	1	4.31531000436787	.687653145515409	-.351766776140996	-1.15155044545532	.327813088685005	-.612417552442535	-1.08768656739351	-.722987679517682	.768036547886722	.996700316369493	-.994042556404947	.270277925623221	.455339517354177
A1WO10R	6	5	2	35	4	0	2	26.5	615	.199999999999999	4	3	-43.0432867677805	-1.67662464204216	0	-11.7570886075948	3	0	1	-1	-114.987179487179	496.507528783463	1	.461505265332158	-.333837004067154	-.746972429260713	-.150298957775669	.0208557025859577	-.363555669650571	.1444079217288	.638338857740104	-.631859854999005	1.28641251478499	-1.29184285753539	1.71689474973224	1.88534404612064
A1WO12S	6	5	2	32	4	0	2	25	667	-1.7	53	53	-190.107989454138	4.85158891463644	2	-.618415306462452	-2	2	-2	2	-1828.74107142857	-465.974209736203	1	-.176517037968652	1.52680833176631	1.76628045371723	-.835558847275207	1.13522827860789	.260247969274444	.69506439901649	-2.10202647471818	2.22603500640454	-1.25512445205441	1.26278693403328	-1.60234377254495	-.641432237056135
A1WO20E	6	5	2	24	4	0	2	30.6666666666667	578	-7.6	2	15	-36.6552238503666	-1.00096627109943	3	-25.5647397426894							1	-.82841100870532	-.915639154144128	-.399467473112324	1.45629070996299	-.30506142671752	1.13291349099142	.0572340875719041
A1WU09C	6	5	2	34	4	1	2	26	710	.5	14	13	-47.6895597621913	3.83638211382113	-1	-11.1606329113923	0	0	0	0	-378.4375	-10.2241151780263	0	-.110967896099024	-.403948207123348	-.401734152670506	-.669864781348865	1.09293809528913	-.675457489113079	-.618632925591254	.691475631568233	-.631859854999005	.160500130573037	-.163428112316277	-.125787275040941	.210558952604409
A1WV06I	6	5	2	27	4	0	2	32.75	1250	9.1	18	0	-80.163600441991	9.08268551023212	12	44.6196661699153	1	-1	-1	1	-552.770833333333	-440.197756195113	1	1.80855487306235	-.221384066863889	-1.17967872133994	-.540867324355057	2.0507115120583	2.53812061051781	2.14690298032857	.673763373625523	-.660910882815051	-1.80161243943537	1.79560107699151	-.842442278487815	-.882528132608747
A1WV11E	6	5	2	23	4	0	2	37.3333333333333	602	2.1	65	56	-93.6100755229796	8.29040805511393	-4	6.20311385387311	0	0	-2	2	-914.125	-416.918110156221	1	.455373620146174	2.13750333162048	1.96644584806123	.149493641680563	1.55733615852345	-.489635542991658	.545729273932239	.691475631568233	-.631859854999005	-1.25512445205441	1.26278693403328	-.0783027413210978	-.0536960266396649
A1WY15S	6	5	2	27	4	0	2	24.8	1940	-2.1	2	6	-288.558331089133	-7.65968867418142	-3	-15.1518981929317	1	-1	0	0	1340.48333333333	107.688519657391	1	-.488613756335279	-.735631785356149	-.648171015980783	-2.23201675617514	-2.60408863599379	-1.01887927691086	-.535309370052161	.673763373625523	-.660910882815051	-.675700055223418	.667186331772394	1.84931172776078	1.1484463623475
A2MA14L	7	5	2	24	4	0	1	30.6666666666667	966	-5.2	6	15	31.8809320859323	-2.23917110938882	-4	-23.8319980769235	0	0	0	0	-830.25	64.4574787228029	1	-.828748901668837	-.697073540127073	-.298103492048252	-.545221366517998	.0184376547724601	-.489635542991658	-.385698021826988	.691475631568233	-.631859854999005	.160500130573037	-.163428112316277	-.486209510432108	.349861452436073
A2MA17L	7	5	2	25	4	0	1	25.4	645	1.8	-7	-10	79.8254310172474	-2.56543959058334	3	10.2858723732408	5	-1	-3	3	-373.068181818182	-142.557988655164	1	.892520321811224	-.842638666110214	-1.48317888808023	1.27589319777807	-1.19453561569868	-.268995764644756	-.0850797165236163	.602914341854685	-.660910882815051	-2.38103683626637	2.3912016792524	-.0532020627610344	-.629755499770885
A2MA20R	7	5	2	23	4	0	1	39.75	1347	-1.5	45	48	-69.9157870370371	-4.0720838068122	2	-50.0433269230768	-2	2	-1	1	-140.660714285714	-405.064343543959	1	-.421034999693092	1.53969552570215	1.80235186467169	-.117923413391694	-1.06351002621201	-.0201338818527919	-1.28526068932864	-2.10202647471818	2.22603500640454	-.965412253638916	.964986632902838	-.302074145853628	-1.15572896246288
A2MA22N	7	5	2	27	4	0	1	34.5	1035	-5.6	-6	8	-46.0060313438634	-5.21511717476578	4	-57.160583232557	1	-1	-2	2	-1248.175	-287.062674820739	1	.207005919235222	-.821748644253697	-.681679859151097	.185290051596043	-.950916354939586	.323287905944987	-.933769120295193	.673763373625523	-.660910882815051	-2.92752482364732	2.92401582221062	-.929718576616993	-.0771178157648244
A2ME09C	7	5	2	25	4	0	1	34.5	1135	-.3	38	37	-19.9422405805249	.466544976348885	1	-12.4050727888144	0	1	0	0	404.6	-77.9959212153057	1	-.0639420923922591	1.29446131987314	1.22343935056717	1.22064737661222	.0428669875116802	-.0516538501880637	-.233239985638309	-.722987679517682	.797087575702768	.996700316369493	-.994042556404947	1.32596284355114	-.0274595846724958
A2MH21E	7	5	2		4	0	1	16	1441				-2.33589737094962	1.74325855609905	0	-13.1346977848102	1	-1	1	-1	113.704166666667	-190.096838531064	1				-.244858231607026	.0520257233708387	-.363555669650571	-1.6757116497523	.673763373625523	-.660910882815051	1.28641251478499	-1.29184285753539	.280642878650848	-.64523835207556
A2MH21L	7	5	2	27	4	0	1	24.5	835	4.9	36	24	-72.9286781017449	-.721286284504245	-2	-30.2151829528175	-1	1	-2	2	-600.8375	-326.865462778758	1	.880806671752836	.73966027511436	.224879058405344	.34910708095857	.109762719369903	-.987359308575586	.498854239383946	-.705275421574972	.797087575702768	-1.25512445205441	1.26278693403328	-.570337171077227	-.781337648848638
A2MI04M	7	5	2	33	4	0	1	13.4	1016	-2.5	1	5	-227.83365071792	3.70347179762948	-1	-9.56025016228494	0	0	0	0	723.825	-222.296890579475	1	.135748626879735	-1.06253433415223	-1.00705958304483	-1.00667493913946	.45278835738749	-.675457489113079	.280432344683666	.691475631568233	-.631859854999005	.160500130573037	-.163428112316277	1.64985696887794	-.354478515058978
A2ML10S	7	5	2	25	4	0	1	18.8	1980	-.1	8	8	53.6587652625152	-1.30130971307442	-1	-19.0274279049009	1	-1	0	0	137.466666666667	610.342254056905	1	-.178546652741212	-.403283180110866	-.496839658387202	.296129279700126	-.473372271520118	-.955839340240314	-.745439104864042	.673763373625523	-.660910882815051	.160500130573037	-.163428112316277	1.14980749877902	2.03478571829067
A2ML14R	7	5	2	29	4	0	1	15.2	1167	-5.9	-18	-4	135.574464036252	1.18708452041786	-1	-31.3469839743589	0	0	0	0	-40.25	558.032223463095	1	-.882329845261711	-1.37844143347147	-1.0709229251494	1.73884671554445	-.319805668225042	-.395075637985843	-.125459799613852	.691475631568233	-.631859854999005	-.675700055223418	.667186331772394	.324614367527395	2.27944663384455
A2MT16R	7	5	2	25	4	0	1	14.2	1338.5	0	3	3	45.2036395369728	-4.05448210326259	-2	-27.6434752024293	0	0	0	0	-2093.78333333333	136.066365578067	1	-.0680441228056827	-.741742868817828	-.8542989974462	-.142303027035818	-1.07404702603178	-.146213755193879	-1.18403953673843	.691475631568233	-.631859854999005	.160500130573037	-.163428112316277	-1.32552621229989	.919244918891466
A2WA03E	7	5	2	24	4	0	2	24.4	2283	-5.3	12	26	-85.2537714726975	-.433131012841159	-1	-8.00785621551432	0	0	0	0	677.5	-236.479152970586	1	-.847229438963395	.43630785622472	.823404450105126	-.530206430234479	-.531301274058744	-.395075637985843	-1.28727523236577	.691475631568233	-.631859854999005	.160500130573037	-.163428112316277	1.4640762527798	-.729630971006615
A2WA03S	7	5	2	25	4	0	2	19.6	1411	3.5	46	33	-134.998088473548	-1.35135135135135	1	-44.3657309357309	-1	1	0	0	-270.090476190476	-269.050581542015	1	.952275711458384	1.32657596813429	.71804867325186	-.94197464295617	-.3165348797316	.228728000939172	-.319513133121932	-2.11973873266089	2.19698397858849	.160500130573037	-.163428112316277	-.515572190375571	-.598381228016753
A2WA12E	7	5	2	23	4	0	2	34.4	1180	.0999999999999996	40	35	-135.592757214802	5.03025369692035	8	-36.8991895218003	0	0	0	0	-1416.0625	-508.743193008517	1	.388894144131146	1.32724099514677	.982669186152345	-1.28038034992654	1.48328585884651	1.85127703492225	-.500035159847816	.691475631568233	-.631859854999005	.160500130573037	-.163428112316277	-1.14358015134037	-1.28798240474692
A2WA21M	7	5	2	27	4	0	2	33.8	1917	10.9	71	31	-154.532757938002	-4.08930012947229	1	33.6084462922156	2	0	0	0	213.014285714286	739.846956705388	1	2.64461897469442	2.51485377906275	.536904380051197	-.582855931372243	-.940833831042188	-.332035701315299	.712129727785752	-.758412195403101	-.631859854999005	.996700316369493	-.994042556404947	2.00192749487414	3.2077632181906
A2WA23N	7	5	2	25	4	0	2	24.6666666666667	1416	-2	38	34	-99.1159802559491	-5.72472790254092	4	-53.1732775467778	1	-1	1	-1	-328.233333333333	676.315484123944	1	.617891517478989	1.11445395108516	.71918201303095	-.526881745506205	-1.8068442820038	1.16443345932669	-1.15456610228551	.673763373625523	-.660910882815051	-1.22218804260438	1.20000047473062	-.0354585378995461	1.60169453516691
A2WA28G	7	5	2	24	4	0	2	30.5	2018.5	-3.4	6	13	5.6548673391635	-4.88234864131564	-1	-15.2135363600333	-2	2	-1	1	-382.821428571429	-204.447978948624	1	-.27416383635033	-.328058434111715	-.234781713270859	.802274584806311	-.265409607615111	-.675457489113079	-.106862651479611	-2.10202647471818	2.22603500640454	-.965412253638916	.964986632902838	-.764960058679112	-.499720729442701
A2WA28I	7	5	2	23	4	0	2	36.6666666666667	1574	-6.6	20	30	-43.9697341876328	-2.44357998811273	6	38.2959339268327	-1	1	3	-3	113.647619047619	-232.120290940989	1	-.372952716227471	.135408872228111	.47018258193653	-.289793393171356	-1.71245402796371	3.19014635388789	2.22900328790786	-2.11973873266089	2.19698397858849	1.86583691161599	-1.88744345979628	.133766119556058	-.842347160105122
A2WA29R	7	5	2	24	4	0	2	36.25	1464	10.4	23	-13	-114.24704818294	-7.44486153158462	3	33.3178120038247	0	0	-1	1	-1718.9375	107.659716926783	1	3.65648019991327	.720100307282805	-1.89203483167379	-1.44782790115733	-.321113038638454	-.829759466899228	.917200745170081	.691475631568233	-.631859854999005	-.965412253638916	.964986632902838	-1.36147776124347	1.3873529432781
A3WE02E	8	5	1	25	5	0	2	28.8	1422	-4.2	3	10			1	29.2871985343103	1	-1	0	0	125.333333333333	-137.429841085876	1	-.654769645504545	-.930750606045207	-.625749895500171			.509109852066408	1.16677982052312	.673763373625523	-.660910882815051	.996700316369493	-.994042556404947	1.03153050464197	.0789101369163877
A2WH09E	7	5	2	24	4	0	2	26	1501	-2.3	8	12	-140.734022742343	-1.4445770625546	1	17.832102910603	1	-1	1	-1	-570.566666666667	-184.698777349747	1	.0915138256091711	-.259277285080483	-.343241621235437	-1.08481026302212	-.808954180417904	1.06987355432088	.88414980672773	-.740699937460392	.738985520070676	.450212328988535	-.461228413446721	-.28796926656585	-.433317007306288
A2WH14R	7	5	2	23	4	0	2	16.2	1381	-.8	15	16	77.1230160959902	5.47892720306513	-2	17.1720968402021	1	-1	0	0	243.008333333333	-3.00407878469431	1	-.183410070818277	-.176049711160653	-.153868061355177	.434343499016781	1.25286335957667	-.70697745744835	2.02556215904559	.673763373625523	-.660910882815051	.996700316369493	-.994042556404947	.930961594406566	.304622262208016
A2WI03E	7	5	2	23	4	0	2	36.75	1461	0	20	19	-94.2222842337125	.643044729066233	0	1.1565639784377	-1	1	-1	1	-514.825641025641	-65.2477138765222	1	-.0409788308524563	.540425452001065	.314613753452543	-1.05538525065535	1.91590597030108	-1.20470122303228	-.0284957676808679	-2.11973873266089	2.19698397858849	-.965412253638916	.964986632902838	-.638942724011269	-.525222446025859
A2WI07L	7	5	2		4	0	2	28.5	1047	-2.6	28	29			0	-20.0081329113922	0	0	1	-1	-478.1875	111.550074757729	1	-.0451236621341832	.158523152049865	.296134215636377			-.363555669650571	.835377979383366	.691475631568233	-.631859854999005	.450212328988535	-.461228413446721	.444729546866758	.870688053149103
A2WI10N	7	5	2		4	1	2	34	590	-19.5	-6	22			1	-56.9340361555501	0	0	0	0	656.2	-617.666818658127	0	-2.45381075734935	-1.58677996160261	-.266319765108948			-.332035701315299	-.274235814847986	.691475631568233	-.631859854999005	.996700316369493	-.994042556404947	2.13422591031418	-.883094010304374
A2WI21I	7	5	2	27	4	0	2	32.25	590	-6.9	10	23	-49.731815835886	4.57869634340221	3	-1.21910533910517	-3	2	0	0	992.591346153846	273.793243069177	1	-1.08878745176987	-.37950387327663	.205857957262004	.524850664817389	.367930349401033	1.41329534211866	.1900753810825	-3.49877752786138	2.22603500640454	.160500130573037	-.163428112316277	1.56870439194319	1.47011177496596
A2WI22S	7	5	2	25	4	0	2	21.25	1455	-.399999999999999	-1	0	-29.044657579263	3.76543209876543	3	12.1949823515093	0	0	-1	1	1049.9375	620.785370498344	1	-.0553573377335907	-.762300377168105	-.929250062240466	-.0432200191502527	1.11741248983309	.0113860864824798	.687524318998342	.691475631568233	-.631859854999005	-.965412253638916	.964986632902838	2.09913230921978	2.32461585219382
A2WL07S	7	5	2	24	4	0	2	29.5	820.1	2.8	25	17	-47.0980037248174	-4.39746502031369	0	-16.9024604430378	1	-1	-1	1	-.942857142857065	-366.399002673219	1	.357388928800979	.842883666950431	.276571551165865	-.219891655657383	-.525504483873381	-.363555669650571	.0235464137361821	-.740699937460392	.738985520070676	-.965412253638916	.964986632902838	-.145585970915979	-.699617729317425
A2WN01E	7	5	2	27	4	0	2	33	909	-6	7	18	-89.3795857025978	1.83224765972106	-3	5.3884727535978	5	-2	0	0	-861.035714285715	-181.542199132659	1	-.83044062347788	-.541177991679572	-.097938097704251	-.246876055878393	.202707797840586	.102648127598085	1.13570576979008	-.811548969231233	-.689961910631097	.160500130573037	-.163428112316277	.836380015682941	-.282394715960193
A2WR03H	7	5	2	27	4	0	2	25.5	951	-2	38	42	-80.0969663411917	-2.63942103022562	-2	13.4936406858741	1	0	-1	1	-44.6125000000002	237.391398593373	1	-.486372394212657	1.17745653016095	1.44972177295502	-.974740394218282	-.0552078865937584	-.70697745744835	1.227196467482	.673763373625523	-.631859854999005	-.12921206784246	.134372188814168	.265646121498111	.651474351358662
A2WR21H	7	5	2	32	4	0	2	22.5	1297	1	7	4	-115.328479698046	.904761904761898	3	2.74796153846148	0	0	1	-1	-1075.4375	-166.229783268385	1	.0301523158895749	.304856641623935	-.227094009918431	-1.34492758807918	.139490668036702	.0113860864824798	-.298235571077741	.691475631568233	-.631859854999005	1.28641251478499	-1.29184285753539	-.685407853148374	-.366534503555753
A2WS27I	7	5	2	23	4	0	2	27.5	177	-6.1	17	25	-19.4627435765466	5.57367149758454	3	3.28600172809649	1	0	-1	1	-1748.44642857143	-1281.53222346309	1	-.38339813917694	-.260274825599205	.0829103072704518	-.179490023878957	1.56870313621308	.572149788736951	.679786004936306	.673763373625523	-.631859854999005	-.965412253638916	.964986632902838	-.918331995087468	-2.0918288784999
A2WT06R	7	5	2	29	4	0	2	35.6	1770	1.6	26	22	88.8054194753327	4.11933745267079	-1	11.6223797468353	-1	1	0	0	-658.7	202.061599107688	1	.211405298735314	.260749003367216	.127210984904506	.949057687578951	1.51380704782354	-.675457489113079	.354033869185068	-.705275421574972	.797087575702768	.160500130573037	-.163428112316277	-.479927126989992	.468106644288684
A2WT28L	7	5	2		4	0	2	18.6	1092	-8.4	3	21			4	-51.9852433544302	0	0	-1	1	-653.829166666667	-379.962530642825	1	-1.24149516820341	-.498732920954055	.197628690582406			.603669757072223	-.404818095042373	.691475631568233	-.631859854999005	-.12921206784246	.134372188814168	-.719100777779965	-1.21621061691532
A3MA02C	8	5	1	25	5	0	1	38.6	2155	7.8	32	15	-46.7856320894296	-.296479054124561	-2	10.0097565725413	0	0	-1	1	-1382.625	-418.307535627813	1	1.78483022385891	.233082871036536	-.524681802662059	.00923835058363821	.10258131778071	-.70697745744835	-.0213007835307983	.691475631568233	-.631859854999005	-.965412253638916	.964986632902838	-.929577187040519	-.45970631938276
A3MA14N	8	5	1	24	5	0	1	25.6	1539				-130.038485308348	.87149466528183	0	-11.1133173076924	-1	0	0	0	726.571428571428	293.620921215306	1				-.172016203055093	-.0545408386308897	-.0831738185233353	-.173093297008984	-.705275421574972	-.631859854999005	.996700316369493	-.994042556404947	2.12193169260245	1.52598331151184
A3MA18I	8	5	1	27	5	1	1	27.2	709				-63.0456329365081	-3.47860510462137	-1	-16.9492750780302							0				-.947350028037098	.678781122340496	1.00683361765034	.387209148171804
A3MA29S	8	5	1	24	5	0	1	8.6	1251	-3.5	13	19	-162.066890515832	.937908863970208	6	-10.2650700574471	2	-1	-1	1	-2354.02272727273	-285.689393524385	1	-.281818256863597	-.0918245967221032	.0343721587459932	-.805078946898203	-.6751753389402	1.78823709825171	.676330409924127	.656051115682814	-.660910882815051	-.12921206784246	.134372188814168	-1.71902086771758	-.151818280666585
A3ME06EL	8	5	1	24	5	0	1	27.25	748	-8.5	6	22	-179.685968432163	-7.31376497723619			2	-2	-1	1	-27.0769230769231	-167.485218850856	1	.120354184116592	-.418062118505704	-.0993673257093026	-.75437749928496	-2.09204769721423			-.758412195403101	.709934492254629	-.965412253638916	.964986632902838	-.0463935759563315	-.179252652284007
A3ME06ES	8	5	1	24	5	0	1	17.6	1057	-3.2	7	12	55.9763060805167	3.0334885299966	0	-17.7265696202531	-1	1	1	-1	-21.9625000000001	30.4792630844171	1	-.621529907497031	-.802188676422142	-.528081821999332	.426777468104126	.582259572334783	-.363555669650571	-.417195778086059	-.705275421574972	.797087575702768	.450212328988535	-.461228413446721	.682353394984604	.307785849388437
A3ME09S	8	5	1	24	5	0	1	22.8	1524	.0999999999999979	15	12	-127.183052811013	-2.17298152260869	0	-27.0106239031239	-1	1	-2	2	-1055.55416666667	-72.9491097094268	1	.740742939523092	-.131047868963659	-.504231473513669	-.279081187515699	-.134411893290566	1.03835358598561	-.654793172680984	-.705275421574972	.797087575702768	-1.25512445205441	1.26278693403328	-.333696613392824	-.0385676353814533
A3MH01T	8	5	1	22	5	0	1	21.2	1204	-2	19	22	-757.515108253534	9.1711307509331	3	-43.4174323634172	0	0	-1	1	-393	-62.1814770131338	1	-.529676861337819	-.308498466280159	-.00992851888806121	-2.31811832131075	.790434977709313	.852531639864187	-.514188843929869	.691475631568233	-.631859854999005	-.12921206784246	.134372188814168	-.182425025252943	-.311022103731194
A3MI11S	8	5	1	23	5	0	1	28.6	1578	.6	-7	-8	38.1177381600645	-4.41394853159558	1	29.3443037974686	1	-1	-1	1	-148.495833333333	933.491778963083	1	-.0708351252418848	-1.22065414056497	-1.43321151155072	.362504518910032	-1.40039298551607	-.0516538501880637	.699433414055532	.673763373625523	-.660910882815051	-.12921206784246	.134372188814168	.504375475696697	2.89438564995531
A3ML08S	8	5	1	24	5	0	1	9.75	741	-.799999999999999	14	14	-43.9284663076496	-.12922992500458	1	-35.7840847127555	0	0	-2	2	-427.5	-396.590312365283	1	.157612607792378	-.286943417411161	-.370787877284334	.443092259498931	-.490978120957225	-.0516538501880637	-1.15930943949937	.691475631568233	-.631859854999005	-1.25512445205441	1.26278693403328	-.158589594580226	-1.26952525040612
A3ML13E	8	5	1	28	5	0	1	42.2	1443	-1.5	31	34	295.640202563697	.174880763116064	-1	-2.79948231093812	2	-2	0	0	-265.232142857143	-322.827664758773	1	-.383143590958574	1.01322564028653	1.11867535016582	1.60855859819861	-.399819832806082	-.675457489113079	.324185772009267	.656051115682814	-.689961910631097	.160500130573037	-.163428112316277	-.0498765184159998	-.471283912454302
A3ML17S	8	5	1	22	5	0	1	22.4	632	1.9	25	17	-138.023961105754	4.3965481646641	-4	-16.7225124783986	0	0	-1	1	-1534.27619047619	-821.177974988211	1	.95971838462159	.239858981510697	-.266023876882989	-.216138340816081	1.70952171188543	-.489635542991658	.213707151857564	-.722987679517682	.768036547886722	-.12921206784246	.134372188814168	-1.57110289890316	-1.77713897292603
A3MN28I	8	5	1	23	5	0	1	25.4	1154	-16.5	-23	10	-210.021985389924	-1.20811615785554	-2	-19.2692458617333	0	0	0	0	-935	-389.663704172271	1	-2.137569207701	-1.93290996472401	-.643637656864419	-.638615959033554	-.799357036789507	-.70697745744835	-1.0436930069897	.691475631568233	-.631859854999005	.160500130573037	-.163428112316277	-.489511180440888	-.693364517727261
A3MO16T	8	5	1	24	5	0	1	35	1113	-7.7	10	21	-162.728372335884	-6.64569940784774	5	-.101331840534158	-1	1	-1	1	-704.829166666667	-35.7648672563008	1	-.37054240762309	-.613513452701004	-.201864646552464	.216914242467287	-1.86850275779312	.915571576534731	1.07580681813026	-.705275421574972	.797087575702768	-.12921206784246	.134372188814168	-.491020073266298	-.0286243415938362
A3MO26R	8	5	1	26	5	0	1	28.2	948	1.3	32	28	-48.7943540123459	-3.73518364957806	-3	-34.2217645487425	1	-1	-2	2	-1209.84166666667	-332.784322166424	1	.210094270758092	.584097240173097	.467915902378349	-.0990885980997491	-.681534175331735	-.738497425783622	.266902567922963	.673763373625523	-.660910882815051	-1.25512445205441	1.26278693403328	-.619767077789116	-.639880865899687
A3MR21C	8	5	1	28	5	0	1	36.8	1756	3.6	52	42	-98.4878040345459	-2.32050670252916	1	13.4770044069853	-1	1	1	-1	-209.520833333333	-242.662869355239	1	.505233227157445	1.70392641557657	1.36624555325519	-.83692476546236	-.169447010559318	.228728000939172	.787155604995074	-.705275421574972	.797087575702768	.450212328988535	-.461228413446721	-.538583275598722	-1.16836180090809
A3MT14L	8	5	1	27	5	0	1	32	1583	4.9	28	16	-90.5439849492277	1.04636569971595	-4	-19.5134260493003	1	-1	0	0	-554.691666666667	-86.6414590356718	1	1.17852488323833	.21252536268626	-.356596023483321	-.0834336564702299	-.342642627022436	-.770017394118894	-.913566566311105	.673763373625523	-.660910882815051	-1.51190024101987	1.49780077586106	-.45834772629366	.140588022408391
A3WA01N	8	5	1	24	5	0	2	35.2	2170	-10.4	-5	26	-34.7533772267208	-1.34576316010914	0	15.2560897435897	1	-1	1	-1	-414.1125	-75.1390048233161	1	-.214536849308079	-.215834673836246	.423911112970254	-.674286921366894	-.207772460866346	-.363555669650571	2.19949981521218	.673763373625523	-.660910882815051	1.28641251478499	-1.29184285753539	-.597666638101039	-.000770954240089584
A3WA04S	8	5	1	23	5	0	2	26.6	1109.01	-2.1	23	25	-158.123231059558	-4.39299027534321	-5	-10.1953512658228	1	-1	0	0	-1101.825	-159.241672743244	1	-.0447429683023628	.288082622191653	.309488617884259	-1.69424173419797	-.47979051615287	-.801537362454166	-.223485827611435	.673763373625523	-.660910882815051	.160500130573037	-.163428112316277	-.933325349408467	-.00548886711203769
A3WA06N	8	5	1	24	5	1	2	23	2121	-.5	20	17	116.156711506027	-1.03296171256962	5	-47.317710569638	-1	1	-1	1	-254.329166666667	-230.183574747434	0	.743533941959295	.0634059247129187	-.277949051125821	1.13006284755141	.414139066590422	2.03709898104367	-.711971548440627	-.705275421574972	.797087575702768	-.965412253638916	.964986632902838	-.390431569408	-1.09546124530033
A3WA08B	8	5	1	25	5	0	2	31.6	1186	7.7	40	22	-74.6222131237034	-4.79323365743288	4	-1.70609892739111	0	1	0	0	49.7857142857142	539.240396883704	1	1.58230570128241	.715215941267641	-.0516666287379734	-.901807282715149	-1.6743986551231	1.44481531045393	.60798546073499	-2.1374509906036	2.19698397858849	.996700316369493	-.994042556404947	1.32861557669023	2.25533349704709
A3WA12N	8	5	1	28	5	0	2	34.8	2137	-.2	28	27	-41.9439109803241	-1.70111287758346	2	-10.1433357921965	-1	1	-1	1	-1574.94166666667	-422.538073874472	1	-.0400484967070555	.626542310898613	.556221369420497	-.331982511837366	-.548116124770114	-.580897584107264	-1.20511524926469	-.705275421574972	.797087575702768	-.12921206784246	.134372188814168	-1.47204733113304	-1.02539305049063
A3WA19S	8	5	1	24	5	0	2	34.4	1741	-38.6	-12	61	-56.3551576310119	-3.50427350427351	0	77.2052326721727	0	1	0	0	-1350.86666666667	-81.5321106830805	1	-4.91180781926221	-1.46010977643854	1.85286080452837	-.00466675939899882	-1.00691171465107	-.363555669650571	4.39880891156525	-.722987679517682	.797087575702768	.160500130573037	-.163428112316277	-.821446205295054	.211180492649559
A3WA22C	8	5	1	23	5	0	2	34	1111	-12.6	13	33	30.5300761904762	1.47510168041588	2	-13.7678058783325	0	0	-1	1	916.6875	-283.604371439089	1	-1.43848048677581	-.433838597419264	.503395536880883	.400482631351294	.26999797938583	.54062982040168	-.0233223152368114	.691475631568233	-.631859854999005	-.965412253638916	.964986632902838	1.09923446388407	-.581083456355954
A3WA26S	8	5	1	20	5	0	2	29	1502	-8.8	34	46	-140.008257142857	8.05967450271247	3	-72.5648266694404	1	-1	-1	1	320.975	-235.339908010642	1	-.963568521989694	.580875441689138	1.26345234418607	-.106907789514126	1.91499048284262	.0113860864824798	-1.92452666922467	.673763373625523	-.660910882815051	-1.80161243943537	1.79560107699151	.315677520073135	-1.11264763968463
A3WA27R	8	5	1	22	5	0	2	31.4	906	-3.3	30	35	-80.6286588261569	-.240756049917763	-1	-39.6992355745523	-1	1	2	-2	-227.466666666667	-782.678848118925	1	-.612945152838362	.335308722353886	.750128288417122	-1.52982814521778	-.464691304648259	-.395075637985843	-.0199773803814555	-.705275421574972	.797087575702768	1.57612471320049	-1.58964315866584	.331781740090371	-1.36051524541386
A3WA29S	8	5	1	23	5	0	2	32.2	1198	-.2	26	26	55.8260893443295	-.724635045346531	-4	-36.9159213242452	0	0	-2	2	8.66666666666697	142.7555831413	1	-.213266365207706	.29675047712481	.388135590241759	.770970951595704	.141871338195313	-.489635542991658	-.524735705844075	-.722987679517682	.768036547886722	-1.25512445205441	1.26278693403328	1.24085515419293	1.52382102462142
A3WE07R	8	5	1	29	5	0	2	29	1017	6.1	60	39	135.658137883703	-9.74952441344325	0	-45.7490009847904	0	0	0	0	-1116.0625	62.7381783889566	1	1.41653050594496	1.9610502748227	1.02894065511862	1.49693451648937	-1.02400441349092	.757971734858372	-1.43046948358191	.691475631568233	-.631859854999005	.160500130573037	-.163428112316277	-1.14058448601763	-.210142517839803
A3WE08A	8	5	1	24	5	0	2	29.8	1162	-.7	29	30	-10.8388726977247	-5.44032549728752	-6	-16.2387578152441	0	0	2	-2	710.375	143.411083525366	1	-.294842934899207	.764437122467319	.816012634978657	.340417659679739	-1.16375867418334	-.833057330789437	-.87202815973897	.691475631568233	-.631859854999005	1.57612471320049	-1.58964315866584	1.09955656859899	.162672141350888
A3WE08M	8	5	1	25	5	0	2	26.8	1298	2.2	20	14	-94.3540555231682	1.16935909618836	1	-25.9408630421599	0	0	0	0	-1398.3125	-426.179514898875	1	.435962748706215	.189411082864504	-.197872850763272	-.336676344982021	.260917864235806	-.0516538501880637	-.680154012499109	.691475631568233	-.631859854999005	.160500130573037	-.163428112316277	-1.15248210580757	-.566869697492714
A3WE19N1	8	5	1	24	5	0	2	20.2	959	-.8	49	48	-171.108636396693	.395811633134159	1	63.3436312817617	0	0	0	0	-511.143589743589	-263.886050151374	1	-.140105603693115	1.20023829647646	1.4326714631439	-.969743735048048	.468266126287243	-.332035701315299	2.59941855608944	-.722987679517682	.768036547886722	.160500130573037	-.163428112316277	.632473461196671	-.201587612712938
A3WE19NL	8	5	1	23	5	0	2	24.8	1379	-3.8	1	10	-25.2704364876388	2.28551336146273	-3	1.1339546910591	-3	3	3	-3	-310.254807692308	-25.8334495938441	1	-.337259868747272	-.36050559587911	-.279919842458044	-.179698481482679	1.01603837968687	.383029978725321	.995495981550536	-3.49877752786138	3.65498243710631	1.02963672581953	-1.05682901570761	-.777698662626538	-.616863351442126
A3WI19E	8	5	1	23	5	0	2	22.2	1491	-.5	28	27	-135.079940818675	.0945610492023974	1	-17.8423953261927	0	0	0	0	-894.357142857143	-314.254078784694	1	.029010234394112	.392532731474239	.383306342899434	-1.53114736020712	-.0900124357414203	-.332035701315299	-.14260997058826	-2.1374509906036	2.16793295077245	.996700316369493	-.994042556404947	-.698027926491182	-.573473252398719
A3WI20L	8	5	1		5	0	2	30.2	1234				223.465783479136	2.47252047083839	6	-33.2797145937363	2	-2	-1	1	-2511.41826923077	-1033.98360140663	1				.860423523824471	2.80182350794373	1.22747339599724	-.164159469249716	.656051115682814	-.689961910631097	-.12921206784246	.134372188814168	-2.47199913268637	-1.73047727844725
A3WI27S	8	5	1	24	5	0	2	20.75	903	3.7	2	-6	-121.689368324566	4.07292180618752	0	1.94274931819194	2	-2	-1	1	-835.348214285714	-328.828812052834	1	.848497267890723	-.564624785007567	-1.25802980547148	-.431061331892922	.735814710925391	-.363555669650571	.794666279455802	.656051115682814	-.689961910631097	-.965412253638916	.964986632902838	-.456313140466432	.11129076358156
A3WL27E	8	5	1	26	5	0	2	16.2	534	-3.2	26	30	-115.871962441315	6.96428571428571	0	-35.6918759990013	3	-2	0	0	-678.548076923077	-130.734297926667	1	-.340050871183474	.269749371806614	.505958104665027	-.451469408301941	.445229281111732	-.0831738185233353	-.81585431358399	.638338857740104	-.689961910631097	.160500130573037	-.163428112316277	-.392593396674971	-.566200508767576
A3WN06S	8	5	1	24	5	0	2	26.75	940	1.4	42	35	-137.448026755853	-2.26068192105716	-1	-59.7986401465474							1	.445097143678463	1.36902103885981	.994594360395177	.142493037970681	-.322518812016714	-.675457489113079	1.70216516680721
A3WN26I	8	5	1	24	5	0	2	29.8	1579	-1.6	3	6	-130.10060010721	-1.34373289545705	4	3.54533090717297	2	-2	-1	1	-175.580357142857	-190.848517963058	1	-.233819318143128	-.660739552863237	-.666058777345032	-.98723487729354	-.402398651204522	.884051608199459	1.11971829220482	.656051115682814	-.689961910631097	-.12921206784246	.134372188814168	.033637197888787	.199351418298427
A3WO06E	8	5	1	23	5	0	2	23.2	852	-4.6	40	46	-165.276622411039	-.0158227848101262	0	-38.4400011988014	1	-1	-1	1	-582.285714285714	-493.009547537321	1	-.268581831477925	1.41724467954076	1.58543204874253	-.948887440597692	-.418798014312397	-.0831738185233353	.695921277204172	.673763373625523	-.660910882815051	-.12921206784246	.134372188814168	-.0172231235963103	-.677378328911767
A3WO11C	8	5	1	22	5	2	2	27.6	858	-2.9	19	24	-32.4886905468607	-6.97999059451752	7	-18.5124832639232	2	-2	1	-1	-1519.90178571429	94.1857723946659	0	-.29543537608109	.249524376962578	.367981149319327	.705272111233872	-1.85815608834731	1.53937521545975	-.487289527900076	.656051115682814	-.689961910631097	.450212328988535	-.461228413446721	-1.38967465877729	.397865569423357
A3WR14S	8	5	1	23	5	0	2	27.6	1985	-.0999999999999996	-10	-9	-105.447753690234	.0303198355999967	0	13.9585507951966	0	0	0	0	-61.7999999999997	424.180046936473	1	.0704540332284732	-1.14831867954354	-1.41049450284415	-.800954031075415	-.0518145850277569	-.643937520777807	.0310580568209057	-.722987679517682	.768036547886722	.996700316369493	-.994042556404947	.635820742437965	1.6106402003403
A3WT14L	8	5	1	24	5	0	2	17.2	1274	-4.8	26	34	-99.1091991657748	2.35294117647059	0	1.32719620253152	3	-2	0	0	8.3125	-163.652057904397	1	-.359673489973495	.629764109382574	.874209278187767	-.522646810611569	.352778752700685	-.643937520777807	1.09961174625401	.638338857740104	-.689961910631097	.160500130573037	-.163428112316277	.905545663997129	-.0824055599030758
A3WU02U	8	5	1	24	5	0	2	22.5	1219	-1.6	-1	2	-37.4385129068461	2.23368072937998	1	2.40500757029548	1	-1	-1	1	93.1041666666665	-51.1618598615548	1	-.125558150330221	-.942307745956084	-.96275890541078	.641596483676093	.572358993915513	-.612417552442535	.245235248842966	.673763373625523	-.660910882815051	-.12921206784246	.134372188814168	.665257361337693	.178071914040798
A3WU07R	8	5	1	27	5	0	2	41	1306	-1.8	25	28	28.1317481929987	4.44027803182733	0	-7.84797468354424	1	0	0	0	-686.414285714286	225.036036129664	1	-.406106852498377	.383864876541082	.563317296321004	.0507802759985846	.898449351363815	-.363555669650571	-.0445560627010658	-.740699937460392	.768036547886722	.996700316369493	-.994042556404947	-.047557779485836	1.5464910370663
A3WU20S	8	5	1	23	5	2	2	26.5	462	7.5	48	24	-332.865063593005	6.91821457557992	6	-18.2179340179339	1	-1	0	0	37.2249999999999	-37.4199674822921	0	1.66443191128749	1.5933652228323	.332205626590832	-1.84940763125966	1.91010314160952	3.75091005614236	-.164566974180275	.673763373625523	-.660910882815051	-.675700055223418	.667186331772394	.238594138218641	-.316083908966725
A3WU25C	8	5	1	21	5	1	2	13.8	675	-16.6	-55	7	-34.9538947844908	1.88956722290057	4	-43.2774249861981	1	-1	3	-3	272.752380952381	436.109116829537	0	-.889394081584551	-2.69139434852656	-.796102354237092	.589340450537195	1.04760489324958	3.96825197059905	1.03666247429178	-.740699937460392	.738985520070676	.193436540023074	-.22621457161894	.471920624623127	1.16357357341524
A3WU28L	8	5	1	25	5	0	2	27.4	1880	-15.2	32	58	-130.045639304893	-5.12789040228064	1	-5.04043748612048	2	-2	1	-1	-416.125	-378.163364750011	1	-1.83777858057464	.656100187688289	1.95082476625517	-1.32867382234248	-1.74405192449135	-.612417552442535	-.119200901365351	.656051115682814	-.689961910631097	-.38598785680792	.369386030641949	-.81611111656018	-1.19111073069171
A3WV18M	8	5	1	24	5	0	2	34	1292	.5	4	3	188.407386817513	-2.94282215850843	1	-48.4743955996107	0	0	2	-2	439.5	242.867369618279	1	.0297716220577539	-.936861689506886	-1.00932626260302	2.16007539799016	.325923970790348	-.0516538501880637	-.10815644636964	-.722987679517682	.768036547886722	.739924527404033	-.759028714577166	1.12217386162273	.823569802962131
B1MA28S	2	2	3	25	2	0	1	27.3333333333333	3635	3.5	-5	-12	-95.339849389658	-2.18590872569014	-5	35.6850314172466	1	-1	0	0	497.0375	129.158540964328	1	.79529701812967	-.827859727715376	-1.53910885173116	-.54300853450026	.0900936843707044	.0396081909275418	1.49748035914815	.673763373625523	-.660910882815051	-1.51190024101987	1.49780077586106	.220325171188616	-.167589938454766
B1MH26R	2	2	3	26	2	1	1	23.4	258.133333333333	-.1	8	8	-9.21958133971282	-3.38351233009828	4	10.1930168052667	2	-2	0	0	-499.241071428571	-340.089106640679	0	-.124416068834758	-.37628207479267	-.490877071265785	-.0926554775762886	.0772422456711253	2.28596086383564	.31805593224885	.656051115682814	-.689961910631097	.160500130573037	-.163428112316277	-.691705694712958	-1.11027117912697
B1MN15S	2	2	3	22	2	1	1	33	112.933333333333	-6	37	35	-53.6595490753411	-2.42265864217084	-2	-9.7868832197338	1	0	0	0	-66.9666666666667	425.527237662349	0	.620259025215066	.616544401940493	.416223409617827	1.52199795433949	.500492345200855	-.146213755193879	-.650084731311675	.673763373625523	-.631859854999005	.996700316369493	-.994042556404947	1.03174289461949	2.49935417288532
B1MU16S	2	2	3		2	0	1	27.75	205.875	1.3	21	18	-78.2484863844169	2.85528877352368	-4	4.87300928270059	0	0	-1	1	-236.9375	-72.1240868842793	1	.231746504320673	-.428725054476307	-.390104866653634	1.22721757522841	-.187935015997257	-1.05039924524613	-.177997104560062	.691475631568233	-.631859854999005	-.12921206784246	.134372188814168	.580579898995886	.144277267413849
B1WE14N	2	2	3	23	2	0	2	23.8	124.85	-.9	18	19	-63.4246092796095	.43412748739317	0	-99.0453099592877	1	0	1	-1	-299.818181818182	-219.557305367461	1	-.320977892707033	-.410391804091269	-.210093913232063	-.439332320478541	.807087934530951	-.643937520777807	-1.25911056234825	-2.15516324854631	2.16793295077245	.450212328988535	-.461228413446721	.325032421271828	-.584611229569885
B1WI03I	2	2	3	25	2	0	2	30	224.625	-.5	17	16	-204.092217244933	.827835169205358	0	-20.6992255995997	-1	1	-1	1	293.5375	-59.5862076582829	1	.283423978754442	-.323277404674997	-.380446371968984	-.952699357758239	-.163527951208886	-.643937520777807	-.853737165006753	-.705275421574972	.797087575702768	-.12921206784246	.134372188814168	.696362124584959	-.0334816041175656
B1WI10R	2	2	3	21	2	0	2	26.6	724.533333333333	-8	0	14	27.2826153372729	1.88470066518846	1	8.06470421245427	1	-1	0	0	-500.870833333333	-337.347313393402	1	-1.01059432569646	-.975419934735961	-.412525987134247	-.411692192268593	-.0419674797109837	.228728000939172	.328264533222939	.673763373625523	-.660910882815051	.160500130573037	-.163428112316277	-.906948580286168	-1.42844356652214
B2ME22I	3	2	3	27	2	0	1	29	978.266666666667	-6.1	10	22	24.0085221445223	-3.49001268230819	-3	-1.34224294871785	0	0	1	-1	30.4666666666662	280.947887120913	1	-.713594701006305	-.235497978246246	.186836856118666	-.538918105087408	-.381177404745854	-.17773372352915	-.391813672814931	-.722987679517682	.768036547886722	1.28641251478499	-1.29184285753539	.612567120241915	.405518986353678
B2MH30U	3	2	3	24	2	0	1	30.8	544.5	-2.8	25	30	-34.0255935422603	.756103742502333	0	-12.6562179487179	1	0	0	0	-488.3125	-735.633027679117	1	-.58008610866267	.293861192147092	.613284672850514	-.176704267023422	1.13095839384992	-.0831738185233353	-1.01423642359665	.673763373625523	-.631859854999005	.160500130573037	-.163428112316277	.256985144920275	-1.74460526021712
B2ML02L	3	2	3	52	2	0	1	22.4	494.083333333333	-1.9	18	20	-110.30576954939	-2.5632911392405	3	9.93556460417199	2	-1	-3	3	-2301.3125	-81.6633043460499	1	-.213478112557768	-.275386277500283	-.119521766631731	-.490205738112579	-.616270854318163	.0113860864824798	-.0100467075988388	.656051115682814	-.660910882815051	-2.38103683626637	2.3912016792524	-1.04037545607642	1.111648423797
B2ML23R	3	2	3	25	2	0	1	26	704	.2	21	20	-47.6793117440482	.374138844727085	0	24.5200364097929	3	-1	0	0	1020.84615384615	-88.8150935871712	1	-.0364961066072117	-.320720633203519	-.202997986331556	.829287226834155	1.02385197701666	-.643937520777807	1.9796034985184	.638338857740104	-.660910882815051	-.675700055223418	.667186331772394	2.67641169766614	-.411721135504184
B2MU01N	3	2	3	24	2	0	1	34	663.666666666667	3.8	22	11	-1.65968444093471	-5.04121750158528	-1	-16.0131674991675	-1	2	0	0	563.857142857143	-471.444105104744	1	1.2513049509211	.096185599986554	-.582878445871167	.924531234862014	-1.64901659658633	-.395075637985843	.397110480111908	-2.11973873266089	2.22603500640454	.996700316369493	-.994042556404947	2.11658985588526	-.604904865003423
B2WA13T	3	2	3	21	2	1	2	34.6	667.333333333333	-7.6	-6	13	-14.7188160036332	2.24358974358974	0	-46.9123387372122	0	0	-2	2	60.1875	-129.113998388937	0	-1.21815121283178	-.605739801708119	-.014165989778467	-.391367082755045	1.34499404671024	-.363555669650571	-1.13055658809706	.691475631568233	-.631859854999005	-1.25512445205441	1.26278693403328	.288246108426109	-.0991161784328063
B2WA23E	3	2	3	23	2	0	2	35.4	652.666666666667	-11.3	-47	0	45.5706541750017	3.76190476190477	-1	-19.4609728035679	-1	1	0	0	610.638095238095	32.9494184579849	1	-.153513232552001	-2.16425943609846	-1.04850180466879	.37301289129506	1.55176073248048	-.395075637985843	-.348590795524989	-2.11973873266089	2.19698397858849	.160500130573037	-.163428112316277	1.11597868554832	.339566664194627
B2WE12S	3	2	3	17	2	0	2			3.6	12	3	147.679497812566	1.16752277869504	-7	8.55041142723331	-3	3	0	0	-1648.73626373626	-738.535591936646	1	1.53371432138006	-.490730093033379	-1.14050317927417	.698468981779433	.014320455179434	-1.70572285250642	-.317824744187936	-3.49877752786138	3.65498243710631	-.675700055223418	.667186331772394	-1.7227363759217	-1.34342492017951
B2WE19S	3	2	3	15	2	0	2			4.7	32	17	-97.7280762173355	-2.37341772151899	1	-18.409030075188	-1	1	-1	1	-934.75	-365.650771083129	1	1.53130401277568	.485093187339709	-.325649748097149	.625181869766067	-1.20625253953554	1.06987355432088	-.0499879971736474	-.705275421574972	.797087575702768	-.12921206784246	.134372188814168	-.470767466132769	-.366925197795619
B2WI07P	3	2	3	24	2	0	2	25.6	597.3	-4.8	13	20	138.149415204327	-3.28088336783989	3	11.0963108542304	0	0	0	0	-360.5	36.9308948952566	1	-.646565584677698	-.505841544934456	-.131446940874564	.889773245987966	-.743476201933476	.0113860864824798	-.118392556096175	.691475631568233	-.631859854999005	.996700316369493	-.994042556404947	.0217340557802873	.625002740036049
B3MA16T	4	2	1	36	2	0	1	46	50	-3.09068950373298	31	30	-217.794881645428	1.01741260992937	0	8.42798359535215	1	-1	3	-3	-665.277416666667	176.347109144568	1	.452249260838974	.500204639240788	.350930839508212	.848582462883848	-.329314973583452	-.643937520777807	.362521253168902	.673763373625523	-.660910882815051	1.02963672581953	-1.05682901570761	-.0543286288493092	.305410148487737
B3ME10R	4	2	1	27	2	0	1	33.8	135	4.59045904590459	26	12	59.5082352509637	.396667469838206	5	-3.04133825079032	1	0	0	0	-882.193047619047	405.901039989134	1	1.56420664737305	.260749003367216	-.575782518970661	1.0458457627375	-.00332061436304684	1.4763352787892	.048364438488039	.673763373625523	-.631859854999005	.160500130573037	-.163428112316277	.184088270675695	1.22076947154476
B3ME18E	4	2	1	20	2	0	1	40.2	149.5	-17.2281697848616	4	33	-56.2228633497878	2.78904936265279	-3	-21.3790928270041	0	0	-2	2	106.215625	-141.764856865085	1	-2.36316796113056	-.855858373552295	.521283298245133	-.374682749142653	1.13885489951104	-.458115574656386	-.66149112308606	.691475631568233	-.631859854999005	-2.92752482364732	2.92401582221062	-.119361602386484	-.444227714813293
B3MH08L	4	2	1	23	2	0	1	38	133	-2.07199032062916	22	23	-22.6292537795002	3.92151486037868	0	.201489807660778	0	0	0	0	-482.4175	-245.483887218503	1	-.0102221546266497	-.146824347877219	-.0326455275946337	.0380522931109228	.357799607986361	.1972080326039	-.228110638870138	.691475631568233	-.631859854999005	-.675700055223418	.667186331772394	-.863869028394448	-1.07360981582686
B3MI04E	4	2	1	26	2	0	1	39.4	394	-1.825303564434	8	10	-38.1844381266449	5.02872187505459	12	26.3488902571739	-1	1	0	0	-589.900083333334	126.526038891721	1	.881718710908587	-.187274337565291	-.584011785650259	-.925721630987929	1.92826680353623	3.09888431277228	1.18521433367291	-.705275421574972	.797087575702768	-.675700055223418	.667186331772394	-1.0186236546255	-.163937372352099
B3ML28I	4	2	1	21	2	1	1	39.8	187	-3.16321048673042	22	28	-74.8458358974365	-.468164794007492	6	-18.9593498363921	0	0	-1	1	-381.614041666667	-145.607697121168	0	-.56244878527199	.330195179410928	.5990928190495	-.473986107812262	-1.09671951572171	2.90976450276065	-.846380659237178	.691475631568233	-.631859854999005	-.965412253638916	.964986632902838	-.760161490217616	-1.11473311759207
B3MN15T	4	2	1	25	2	0	1	43.8	170	-1.84071961386573	-3	1	62.9755666666667	-2.44111850009122	-1	15.5227631578946	-1	1	-1	1	120.862166666667	-456.758017668251	1	-.432263047595162	-.777079315562942	-.796939805790223	1.18595101547263	-.641752806958698	-.675457489113079	1.06927456627613	-.705275421574972	.797087575702768	-1.80161243943537	1.79560107699151	.68427357874344	-1.04332144524732
B3MO13T	4	2	1	21	2	1	1	55.4	1042	-9.89461125472261	-21	5	29.6709966374187	5.77111607351874	-2	-25.7781578947367	0	0	1	-1	-1640.65	-27.973019965033	0	-.85305289104291	-1.45911223591982	-.738743162581115	.223893030733378	1.2191074145181	-.70697745744835	-1.65871815079035	.691475631568233	-.631859854999005	.450212328988535	-.461228413446721	-1.57169090380869	-.127254828181233
B3MR17E	4	2	1	25	2	0	1	29.2	135	-4.56412114623909	17	26	322.578382656103	3.86424247940656	-1	-39.754989733784	-1	1	0	0	674.434333333334	-258.386578784694	1	-.111798638960764	.486755754870912	.543162855398574	3.3356580943969	-.777738397967542	.165688064268629	.116422944937493	-.705275421574972	.797087575702768	.996700316369493	-.994042556404947	.930519349664303	-.900877243059593
B3MR26I	4	2	1	24	2	0	1	47.2	761	-1.65885188021894	70	72	-63.8511671554846	-2.10526315789474	2	13.2054089581305	0	0	1	-1	-58.8406249999998	-8.85346910903024	1	-.384482934526725	2.57496707316083	2.99821909516741	-.547497959675596	-.580063987847112	-.0201338818527919	.960020162288095	.691475631568233	-.631859854999005	1.28641251478499	-1.29184285753539	.188227900025652	-.3275205373829
B3WA25N	4	2	1		2		2	39	21.5
B3WI21E	4	2	1	23	2	0	2	42.5	333	-11.7832512315271	30	44	-262.785833460657	2.67806267806269	-5	-62.8210998650472	-1	1	0	0	-550.346461538461	-260.743665224361	1	-1.25132943195377	.173302090444705	.992869244164166	-1.73419909496199	-1.18585440409368	-1.64268291583587	-3.28602974553913	-.705275421574972	.797087575702768	.996700316369493	-.994042556404947	.485537584852782	-.0443368020397459
B3WK19C	4	2	1	22	2	0	2			-4.31569929321054	27	34	53.8668644046317	9.05602240896359	6	-1.17077391961931	1	-1	-2	2	-1515.50219047619	468.443201637501	1	-.479254830740169	.551650078405703	.850358929702102	.874393352735955	3.69701952459007	1.78823709825171	2.11522380828079	-.740699937460392	.738985520070676	-2.09132463785087	2.09340137812195	-1.14617226114777	1.59391239957496
B3WL18N	4	2	1	24	2	0	2	43	30.5	-1.58859707931326	34	33	-36.7438501433521	4.6080586080586	-1	-22.3231426906428	0	0	-1	1	-613.276666666667	165.23594906209	1	.110719998455156	.580875441689138	.59879693082354	-.65532894606738	.138567344118251	-.395075637985843	-.430793373096635	-.722987679517682	.768036547886722	-.965412253638916	.964986632902838	-.927049690061868	.0564981382877335
B3WL19A	4	2	1		2		2	52.5	147
B3WN03N	4	2	1		2		2	40	360.18
B3WN03R	4	2	1	24	2	0	2			-.402615389570651	25	25	48.693801307847	3.78196698619233	-3	-22.1318868157159	3	-2	-1	1	-808.958333333334	-363.926403110512	1	-.114333682269912	.76188035099584	.631468322440722	.718765501363685	.885373397715926	-.738497425783622	-.476573330315943	.638338857740104	-.689961910631097	-.12921206784246	.134372188814168	-.0519045937321476	-.846582720988139
B3WN08R	4	2	1		2		2	40	88
B3WN18S	4	2	1	16	2	1	2			-2.97669491525424	17	16	27.5528568767235	6.54273459151509	1	-4.79228770891558	-1	1	2	-2	-1059.85570833333	-329.149961441071	0	1.17762878433212	-.314277036235599	-.612987269704208	2.20551615587238	2.38517194322098	.509109852066408	-.386762582826068	-.705275421574972	.797087575702768	1.57612471320049	-1.58964315866584	-1.15773373874374	-.780395007566454
B3WO21I	4	2	1	23	2	0	2	35.3333333333333	41	-3.13522261630109	31	37	-108.584167003631	-1.69813086934204	-3	-13.6298101265823	1	-1	1	-1	682.447416666666	339.37355921619	1	-.488459481142776	.950223061210737	1.19362641496009	-.237970614148118	-.602628706454151	-1.29926112803809	-1.16415230127475	.673763373625523	-.660910882815051	1.28641251478499	-1.29184285753539	1.61597353914336	.80898877076196
B3WO24I	4	2	1	22	2	0	2	40.8	173	-.0358457978948743	34	33	52.3918734204794	2.89675448204301	2	3.74883877725654	1	0	0	0	-1970.163125	-775.945921215306	1	-.104729817338075	.490871757295148	.634572453552035	1.41797584211709	.936616611230988	-.0201338818527919	.431511307943113	.673763373625523	-.631859854999005	.996700316369493	-.994042556404947	-1.55900841948818	-1.06378387981309
B3WO31H	4	2	1	25	2	0	2	39	95	-2.78078728782954	18	23	241.047616450216	-4.06385095495367	-1	19.7948068387309	-1	1	0	0	1004.33242857143	225.416561315128	1	-.504638977087423	.0486269863180807	.271446415597581	1.71253096101486	-.394990978482077	-.675457489113079	-.0985963434948001	-2.11973873266089	2.19698397858849	.160500130573037	-.163428112316277	1.56139625048019	1.34237257759302
B3WU20L	4	2	1		2		2	32.4	448
B4ME10R	5	2	3	23	2	0	1	34.8	281	.983268983268983	34	31	24.5357224736052	1.84412906109678	-1	-8.71651348651341	-1	1	0	0	313.988958333333	-212.421605104743	1	-.0144397802254403	1.08489607429548	.930435130064652	.202508480273926	.036580473297503	-.114693786858607	.604233099675406	-.705275421574972	.797087575702768	.996700316369493	-.994042556404947	.60396257623857	-.495048787258566
B4ME19N	5	2	3	24	2	0	1	44.4	472	.146787738103366	-43	-43	79.4642896201848	-2.54633360193392	0	.61436473974635	2	0	1	-1	-415.618660714286	-32.9569839430186	1	-.213297757737151	-2.8817321397789	-3.29743006297221	.909611155591868	-.952848497125381	-.643937520777807	-.0520790381851009	.656051115682814	-.631859854999005	1.28641251478499	-1.29184285753539	.391567623998015	.361994771148436
B4ME26B	5	2	3	23	2	0	1	42.2	88.5	-4.80934697944027	-2	7	-89.5943975774259	1.1094897273759	0	.999193870752947	0	0	0	0	-1175.6075	-219.687724399158	1	-.358472486144192	-1.017199978449	-.778214592872844	.492280166194761	-.653909415107306	-.643937520777807	-.73314378689113	.691475631568233	-.631859854999005	.160500130573037	-.163428112316277	-.89735675881689	.266461856289292
B4MI01D	5	2	3	29	2	0	1	25.2	137	.530652143555369	-19	-19	-127.581477819283	-2.61538461538461	0	-5.54607923721835	0	0	0	0	-112.4805	-300.633394895257	1	.129079718540295	-1.52533661347958	-1.91076004459117	-.387417363110497	-.936645524334404	-.643937520777807	.356198660849598	.691475631568233	-.631859854999005	.996700316369493	-.994042556404947	.831826712693348	-.151989629103953
B4MI06S	5	2	3	19	2	0	1	44.2	436	.527654164017801	47	45	102.942190553619	-2.7858709273183	0	25.4765400843883	2	-1	-2	2	-1105.58850961538	50.5420813426094	1	-.087536137297417	1.4374696743848	1.51871025062786	1.26258389527245	-1.0274180122862	-.0831738185233353	.832537002108504	.656051115682814	-.660910882815051	-1.25512445205441	1.26278693403328	-.372686183397319	-.0624011777287912
B4ML14T	5	2	3	23	2	0	1	32.8	451.5	.677441027172296	-75	-54	-257.666651082251	1.23417721518987	-2	-23.0022884743504	0	0	1	-1	-394.395625	113.405910222525	1	1.46884440562989	-3.71221947109664	-3.91211809980523	-1.1677034466532	.00787994794588783	-.426595606321115	-.912663300567562	.691475631568233	-.631859854999005	.450212328988535	-.461228413446721	-.171090774909089	-.109978179666459
B4MU17S	5	2	3	24	2	0	1	37.8	248	-3.22547822547822	19	24	-88.2557281293952	-4.80416156670746	1	37.2670537974682	-1	0	0	0	-306.434291666666	-829.683373199838	1	-.377524139694695	.0425159028564017	.248729406891009	-.408468571021633	-1.65392290053872	-.612417552442535	1.67274448130071	-.705275421574972	-.631859854999005	.996700316369493	-.994042556404947	.848356982829085	-1.17537580646129
B4WA26E	5	2	3		2	0	2	41.6	375	2.97081241866518	2	-3			0	-1.76955290490088	0	0	-1	1	-7.27624999999989	-126.169421943997	1	.546366391178213	-1.00564283853812	-1.33214341871261			-.363555669650571	.331623310750499	.691475631568233	-.631859854999005	-.12921206784246	.134372188814168	.386534206163632	.152191517942784
B4WC25N	5	2	3	28	2	0	2	40.2	188	-.470451633568226	1	2	-76.1698547786701	-3.06758832565284	-2	24.443111276909	0	0	-1	1	-460.625	243.384079200392	1	-.063983619545726	-.513511859348893	-.72425542055414	-.423090875383443	-.390887714566152	-.426595606321115	.989215232767313	.691475631568233	-.631859854999005	-1.80161243943537	1.79560107699151	-.630958942576379	.652367672433036
B4WD04S	5	2	3	24	2	0	2	42.4	275	-.722066449964021	20	21	-29.8850156957774	5.03599893843796	2	-15.8886688311687	0	0	0	0	184.475625	48.9112124862679	1	-.260065943605101	.108407766909913	.167815754975326	-.569204531312753	.22667534652993	-.0201338818527919	-.0392007551260649	.691475631568233	-.631859854999005	.160500130573037	-.163428112316277	1.19870222453267	.61827626807175
B4WE21C	5	2	3	22	2	0	2	39.8	355	5.69312169312169	-11	-20	-115.145026191091	3.59236661093753	2	-13.2642656066304	0	0	0	0	-883.908	-319.662171215306	1	1.64988153696563	-1.29521385955164	-2.1861723919554	-.429514222110012	.839011315223094	-.0201338818527919	.696724591644303	.691475631568233	-.631859854999005	.996700316369493	-.994042556404947	.0914058631733905	.0876566693963826
B4WI08S	5	2	3	22	2	0	2	47.2	82	-5.37070524412296	17	25	79.3060300252811	-4.66833330258358	0	-10.0015170040485	0	0	-1	1	-138.112	59.8537991682957	1	-.815484246865381	-.332277773114397	.142536178484612	.604708843827081	-.900815183170086	.477589883731136	-.12075748856393	-.722987679517682	.768036547886722	-1.80161243943537	1.79560107699151	.383477172046002	1.57729736716649
B4WI19I	5	2	3	24	2	0	2	41.4	193	-9.94567230522287	4	21	10.427492647059	.709461144400194			1	-1	-2	2	-616.759208333332	411.272579782387	1	-.616229383373519	-.774855057597704	-.172051710945384	.722054688761491	.196776061523608			.673763373625523	-.660910882815051	-1.25512445205441	1.26278693403328	.979400397382301	2.14033971728442
B4WL14T	5	2	3	21	2	0	2	47.8	218	-2.65349794238683	7	13	13.6888212512167	-5.08072174738841	0	-13.7075743670886	0	0	-1	1	-986.329375	-359.732447183222	1	-.268636830095423	-.0461577275126262	-.0618666867497946	-.519131356172301	-1.1198158920293	-.643937520777807	-1.01813017673628	.691475631568233	-.631859854999005	-.12921206784246	.134372188814168	-.981667617995134	-1.15628894331782
B4WM24S	5	2	3	32	2	0	2	32.2	156	-7.08284371327849	1	14	-180.278876183959	1.49233716475096			6	-6	1	-1	-1332.0105	-322.46374031765	1	-1.01831774078194	-.864526228485454	-.340974941677254	-1.95170309395584	.401361445846203			.585202083911973	-.806166021895282	-.38598785680792	.369386030641949	-1.32157397817517	-.45688535048255
B4WS02M	5	2	3	20	2	0	2	38	772	-2.8532016843328	19	24	-133.733328697462	-.469339556808038	2	-2.83725745773216	0	0	-1	1	-135.262	98.8382279961048	1	-.488688293399491	.0875177450533965	.314317865226584	-.701468782231315	.733038718133638	-.0201338818527919	.0268852152512862	-.722987679517682	.768036547886722	-1.80161243943537	1.79560107699151	-.66401768600525	.0391575504789042
K1MA01S	0	0	3	25	0	0	1			-3.5	-33	-22	-47.8203751881197	-3.71762124635687	-1	-40.8779335000396	0	0	1	-1	-101.125	-163.983412514447	1	-.33594884077005	-1.9708031829406	-2.0095614578711	-.441518383007714	-1.22290133366221	-.395075637985843	-1.88074051722552	.691475631568233	-.631859854999005	1.28641251478499	-1.29184285753539	.0294177685731938	-.306002621482909
K1ML04N	0	0	3	27	0	0	1			-9.5	12	28	-94.6300676644162	1.73914046992567	1	-42.1981718597859							1	-1.47725942878742	-.481729724593979	.342701572828612	.665801002671152	-.441564564745813	-.0516538501880637	-.174957655726206
K1WA06L	0	0	3	28	0	0	2			3.8	23	11	5.69738971341383	.689497944399918	-1	4.96169212191882	1	-1	2	-2	-824.8875	55.1401013836334	1	1.10515237437367	.495091096297829	-.350337548135944	-.139913538678443	1.01740667041223	.165688064268629	1.1548825400556	.673763373625523	-.660910882815051	1.57612471320049	-1.58964315866584	.110622439467812	.571390087247555
K1WA17C	0	0	3	25	0	0	2			.6	22	20	-3.19355898268429	3.89511410063974	1	18.6304971642281	0	0	0	0	175.9375	22.6000811458028	1	.0374260425710216	-.0118188212862343	-.0360455469319085	-.074119756856448	.50315686425125	-.0516538501880637	1.08779302064173	.691475631568233	-.631859854999005	-.675700055223418	.667186331772394	.21794069492088	.50401383330195
K1WA17E	0	0	3	31	0	0	2			-.1	4	4	-53.9940358770992	-3.64847326236034	0	-27.5627206970245	0	0	1	-1	-989.666666666667	-589.358722376477	1	-.0973507768815319	-.819856899794699	-.877016006152773	.352776732462612	-.602005155517772	-.363555669650571	-.49105851089613	.691475631568233	-.631859854999005	1.28641251478499	-1.29184285753539	.194864292631572	.11646907149719
K1WI14R	0	0	3	24	0	0	2			-9.2	10	32	-152.607715588723	-1.81997677119628	1	-65.0530536130533	1	0	-1	1	-1429.63942307692	-586.763233118407	1	-.891338094620503	.169518601526709	.860017424386752	-1.19648946055214	-1.15917135611062	.509109852066408	-1.23078505432286	.673763373625523	-.631859854999005	-.965412253638916	.964986632902838	-.962830974051039	-1.04185087497944
K1WM15A	0	0	3	28	0	0	2			10.7	10	-18	-9.97917655704089	2.13045915857161	8	3.92080161206968	1	-1	1	-1	237.645833333333	-91.9791580124342	1	2.40737473965142	.0705145486933197	-1.83211307223367	-.0426735487951683	1.24079308981835	3.25318629055843	.706732479945447	.673763373625523	-.660910882815051	.450212328988535	-.461228413446721	.209373214536935	-.31063203213645
K1WN11T	0	0	3	21	0	0	2			-3.9	19	24	38.3054346499927	-1.10294117647059	-1	-33.2626693037973	0	0	1	-1	-51.5625	170.927488392274	1	-.0417830193844017	.0875177450533965	.177178361434017	-.0280487986182634	-.192480681426091	-.955839340240314	-1.54241585684967	.691475631568233	-.631859854999005	-.38598785680792	.369386030641949	.739950318583099	-.0576191503649396
K1WO21Y	0	0	3	28	0	0	2			-2.3	-6	-2	-237.234340096523	.998731769181987	5	-158.243992156463	-1	2	0	1	-1680.85714285714	17.7955437494548	1	-.287400261736001	-1.42477332969343	-1.3250474918121	.333428467156249	.12675517092845	.915571576534731	-1.37773458842008	-2.11973873266089	2.22603500640454	.160500130573037	.134372188814168	-.628733330161701	.758406114586331
K1WR01E	0	0	3	25	0	0	2			.5	13	12	-9.65878106841183	-3.38511942506869	4	17.9604430379749	1	0	1	-1	367.995833333333	59.78444462841	1	-.11638095448967	-.334834544585876	-.379017143963932	-.097776148886507	.128256897411087	.603669757072223	1.45223158329111	.673763373625523	-.631859854999005	1.28641251478499	-1.29184285753539	1.24849233507948	.0834050541438564
K2MA11R	1	0	2	28	0	0	1			5.20833333333333	23	13	-225.49136646132	4.26724137931035	2	-40.1195166858455	1	0	-1	1	-675.578125000001	-825.161701075998	1	.694200700832018	.0540730427672789	-.371921217063426	-1.01648463737405	.667972886520738	-.300515732980028	-1.33515449009545	.673763373625523	-.631859854999005	-.12921206784246	.134372188814168	.532317419121818	-1.05197395783268
K2MA17I	1	0	2	27	0	0	1			-4.91954022988506	5	12	119.535024709706	-8.87789040228064	1	-8.07962415467301	0	0	0	0	-1460.168	-94.1048900292251	1	-.766838941218759	-1.02397608892316	-.63540839018482	2.06912340884966	-1.4553348672348	1.35025540544812	-.0317243849730171	-.722987679517682	.768036547886722	.160500130573037	-.163428112316277	-.882759677348381	-.647504130396147
K2MA22N	1	0	2	29	0	0	1			.389845309381237	-25	-25	-50.3715774845093	.945517896737414	0	-8.38822703667626	0	0	2	-1	802.0325	-12.0184636160242	1	-.0553167132118855	-2.03769258751284	-2.34686635600767	-.0426495404434326	.894499783337169	-.363555669650571	-.767915249199826	.691475631568233	-.631859854999005	1.57612471320049	-1.29184285753539	1.69298723814447	.666525920816906
K2MI01C	1	0	2	25	0	0	1			.320945945945947	25	23	-119.842498595999	2.40963855421687	1	-42.2273383692255	0	0	0	0	-358.800625000001	-444.863438684872	1	.0954697864501531	.0688519811621169	.0687184534694369	-1.50036702220014	.371246772366071	.509109852066408	-1.1983949993646	.691475631568233	-.631859854999005	.160500130573037	-.163428112316277	.0210105277119374	-1.10995513602616
K2MI30S	1	0	2	23	0	1	1			-6.24480249480249	23	34	-17.8847318545332	1.09550942884276	1	.696872020384774	0	0	1	-1	-194.3925	187.577931900586	0	-.954243935929932	.198078937797663	.77880788424511	-.965053377193516	-.0333776863990323	-.332035701315299	-.215606314968272	.691475631568233	-.631859854999005	.450212328988535	-.461228413446721	-.383597378215824	.384399555259957
K2MO09M	1	0	2	24	0	0	1			-.0206412549883033	3	3	101.943819163293	-4.66082353104125	0	3.66476955533915	0	0	0	0	-109.430666666668	-605.06913924492	1	-.208082035474551	-.90374950072701	-.931812630024608	2.14509641235356	-.770366454404269	-.0831738185233353	-.242462962536671	-.722987679517682	.768036547886722	.160500130573037	-.163428112316277	.48878014715758	-1.24384483956953
K2MR08D	1	0	2	24	0	0	1			.98868979539967	32	29	6.82823265455647	-2.28553542967613	-1	20.2267277659051	0	-1	0	0	-1372.93717948718	107.887949957701	1	.0622856733429792	.611098345491294	.558488048978679	-.04720312867313	-1.07598836430107	-.395075637985843	1.49174766846621	-.722987679517682	-.660910882815051	.160500130573037	-.163428112316277	-.881141827715689	.16989497775334
K2MT04I	1	0	2	23	0	0	1			7.22506128214716	13	-4	64.5911941468013	-6.76190716841124	-4	-15.2334995657779	1	0	0	0	-1804.37370833333	91.3655919366461	1	1.34645047796064	-.0288220176463097	-1.1066984478779	2.16768433401039	-2.28822811542079	-1.33078109637337	-1.54486187644611	.673763373625523	-.631859854999005	-.675700055223418	.667186331772394	-1.47240814752963	.107948686072302
K2MU05S	1	0	2	34	0	0	1			-10.4838709677419	-6	14	7.3534846761147	-6.98572691587511	0	-6.58466261808366	0	0	1	-1	-844.46375	-16.7860686704234	1	-1.18721671106225	-1.18176338182966	-.424451161377079	.121889112449457	-.641899068619558	-.363555669650571	.635645450570484	.691475631568233	-.631859854999005	.450212328988535	-.461228413446721	-.296276719397753	-.14848069960097
K2WA06L	1	0	2	23	0	0	2			.498026116003644	7	6	-58.6890184262995	4.40376212384284	3	-16.9071518987342	0	0	0	0	395.994375	249.036766056981	1	-.115468500361099	-.631181676073561	-.71375947431636	1.07354306593723	.262440892603146	-.268995764644756	-.157190182424965	.691475631568233	-.631859854999005	.996700316369493	-.994042556404947	.75099404667507	1.02373757875602
K2WA10R	1	0	2	23	0	1	2			3	25	15	287.47803085169	-.0584875004116014	0	-.29187831372036	1	-1	0	0	87.9039583333324	114.490052049355	0	1.15217817808044	.203857507753101	-.393504885990907	3.30004349774489	-.16286423342094	.1972080326039	-.210136843677068	.673763373625523	-.660910882815051	-.675700055223418	.667186331772394	.498446219134168	.684181189386804
K2WA14L	1	0	2	27	0	0	2			1.95515449822259	21	15	-231.54415301738	1.50316455696202	-5	-51.3308936780766	2	-2	1	-1	-1244.47803571428	88.3953875111328	1	.838271928184475	-.320720633203519	-.560457325390554	-1.26252199793104	.360912553529401	-1.36230106470864	-1.69680517034239	.656051115682814	-.689961910631097	.450212328988535	-.461228413446721	-.578787173760081	1.51213349210149
K2WA27E	1	0	2	24	0	0	2			-3.00425381070542	9	15	-37.8578996426157	5.24236009336155	1	5.99002689873407	1	-1	1	-1	-659.074278846153	5.85217580098438	1	-.511237698940626	-.265388368542162	-.101338117041524	.0809718651451209	.555099294286792	-.612417552442535	.626959683724896	.673763373625523	-.660910882815051	1.28641251478499	-1.29184285753539	.608193400273784	.0816749113657101
K2WD17R	1	0	2	25	0	0	2			-5.67698259187621	23	32	-42.3248092185593	-6.15457782547193	0	-50.7091915436163	3	0	2	-2	-700.737596153846	147.828583600096	1	-.92378719449171	.0180715690096828	.573813242558785	-.197976693712042	-.520832580871268	-.0831738185233353	.29926652097014	.638338857740104	-.631859854999005	.739924527404033	-.759028714577166	-.655122974634644	.293640856516166
K2WE06C	1	0	2	24	0	0	2			16.6699585226151	66	18	6.99883322141648	-3.34178017104846	0	13.6798250173252	0	0	1	-1	-691.655164835165	-52.9177320215747	1	3.34480259135007	2.23939666943159	-.121788446189914	.720082051417287	.00198665516000028	.477589883731136	1.21209999585731	-2.1374509906036	2.16793295077245	1.28641251478499	-1.29184285753539	-.600441390330945	-.207568626766451
K2WH14M	1	0	2	23	0	0	2			-6.94105894105894	32	39	48.9298143076282	4.49743918053777	-1	-9.97429487179471	1	-1	-2	2	-1287.227	-175.154194388157	1	-.680440500374458	.251083607915335	.760624234654903	1.34121941010546	1.33162388375496	-.675457489113079	-.00933618232594845	.673763373625523	-.660910882815051	-1.25512445205441	1.26278693403328	-.332114160557339	.181822956775757
K2WI12I	1	0	2	25	0	0	2			-17.3460572576595	94	96	190.388124826464	-5.32627343961634	-1	33.2412423863055	0	0	-1	1	-2068.74607142857	-301.708338931884	1	-.842208668444883	3.56234749344479	3.72304194307127	2.07786323160181	-1.28514961286006	-.114693786858607	1.8779498567287	.691475631568233	-.631859854999005	-.12921206784246	.134372188814168	-1.01294448097053	-.0887621447773075
K2WJ19V	1	0	2		0	0	2			1.16303219106957	34	30			1	-58.1208605974395	-1	1	0	0	-664.437125	-335.87966413434	1	.187187687476341	.679879494522526	.577509150122019			.509109852066408	-2.06023798672872	-.705275421574972	.797087575702768	.160500130573037	-.163428112316277	-.878592574125432	-.973541954512202
K2WN15N_1	1	0	2	23	0	0	2			-.508147390757282	35	34	-23.2048284663648	2.81925978753007	7	7.72902466731591	-2	2	-1	1	-1114.29571428571	-562.804341274393	1	-.0456825290800832	.646767305742649	.731107187273783	.406896121050566	.302735303336935	.137465959823567	.662230363614281	-2.10202647471818	2.22603500640454	-.12921206784246	.134372188814168	-.659876456777636	-.613617663311109
K2WN15N_2	1	0	2	25	0	0	2			-.396139440955056	22	22	-112.928703253275	-.0735294117647101	-1	-7.00090705128213	-1	1	2	-2	362.709249999999	113.709895081707	1	-.168040519152021	-.110822874119623	.0139218295976018	-.719793833269723	-.129244485488923	-.675457489113079	-.0609948295089471	-.705275421574972	.797087575702768	1.57612471320049	-1.58964315866584	.797670225035394	.935133530435628
K2WO20M	1	0	2	24	0	0	2			-12.5208125208125	2	21	208.322563829205	3.35474237435022	3	-8.86184588673592	1	0	0	0	343.535857142858	-527.514867256301	1	-1.14110178856525	-1.08664615449271	-.267453104888041	2.29780993104175	.690808364619498	.291767937609716	-.619628548995551	-.740699937460392	.768036547886722	.160500130573037	-.163428112316277	1.67848170176271	-.628582061808916
K2WR29N	1	0	2	23	0	0	2			-7.7975900257714	-1	22	-37.2506571011458	-.34644574299864	0	21.6965521391838	0	0	-1	1	-2171.88625	-709.951408914124	1	-.880834470542064	.0297320454990063	.598255367496367	.697329110846996	-.225947775805871	.477589883731136	1.0866234639633	.691475631568233	-.631859854999005	-.12921206784246	.134372188814168	-2.37386985572915	-1.52006229194691
K2WU19S	1	0	2	27	0	0	2			-6.002331002331	13	21	54.7025774261679	-5.51803974532125	0	-40.7989516390783	1	0	1	-1	-1064.04912820513	-524.137948690509	1	-.809786974998106	-.658847808404239	-.178014298066801	.559441860267467	-1.19727909572151	-.363555669650571	-.983486092081405	-.740699937460392	.768036547886722	1.28641251478499	-1.29184285753539	-.556007195717749	.0317335195512921
